CORRECTION

# Correction: Identification of novel antimicrobial peptide from Asian sea bass (*Lates calcarifer*) by *in silico* and activity characterization

Behrouz Taheri, Mohsen Mohammadi, Iraj Nabipour, Niloofar Momenzadeh, Mona Roozbehani

The following information is missing from the Funding section: This study was also supported by the Iran National Science Foundation Research Chair Award No. 95/INSF/44913.

## Reference

1. Taheri B, Mohammadi M, Nabipour I, Momenzadeh N, Roozbehani M (2018) Identification of novel antimicrobial peptide from Asian sea bass (*Lates calcarifer*) by *in silico* and activity characterization. PLoS ONE 13(10): e0206578. <https://doi.org/10.1371/journal.pone.0206578> PMID: 30365554

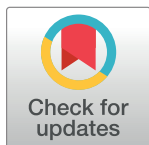

## OPEN ACCESS

**Citation:** Taheri B, Mohammadi M, Nabipour I, Momenzadeh N, Roozbehani M (2019) Correction: Identification of novel antimicrobial peptide from Asian sea bass (*Lates calcarifer*) by *in silico* and activity characterization. PLoS ONE 14(2): e0212759. <https://doi.org/10.1371/journal.pone.0212759>

**Published:** February 20, 2019

**Copyright:** © 2019 Taheri et al. This is an open access article distributed under the terms of the [Creative Commons Attribution License](https://creativecommons.org/licenses/by/4.0/), which permits unrestricted use, distribution, and reproduction in any medium, provided the original author and source are credited.
